# Supplementary material for: Synthesis, structure and photoluminescence properties of europium-, terbium-, and thulium-doped Ca3Bi(PO4)3 phosphors
Source: Royal Society of Chemistry journal article supplement (doi:10.1039/c3dt50552a), 2013-01-01
Supplement: c3dt50552a.pdf [file c3dt50552a.pdf]

## **Supporting Information**

**Title:** Synthesis, Structure and Photoluminescence Properties of Europium-, Terbium-, and Thulium- Doped  $\text{Ca}_3\text{Bi}(\text{PO}_4)_3$  Phosphors

**Author(s):** Mengmeng Jiao<sup>a,b</sup>, Ning Guo<sup>a,b</sup>, Wei Lü<sup>a</sup>, Yongchao Jia<sup>a,b</sup>, Wenzhen Lv<sup>a,b</sup>, Qi Zhao<sup>a,b</sup>, Baiqi Shao<sup>a,b</sup>, and Hongpeng You<sup>a,\*</sup>

<sup>a</sup>State Key Laboratory of Rare Earth Resource Utilization, Changchun Institute of Applied Chemistry, Chinese Academy of Sciences, Changchun 130022, P. R. China.

<sup>b</sup>Graduate University of the Chinese Academy of Sciences, Beijing 100049, P. R. China.

\*Corresponding author: E-mail: hpyou@ciac.jl.cn (H.Y.)

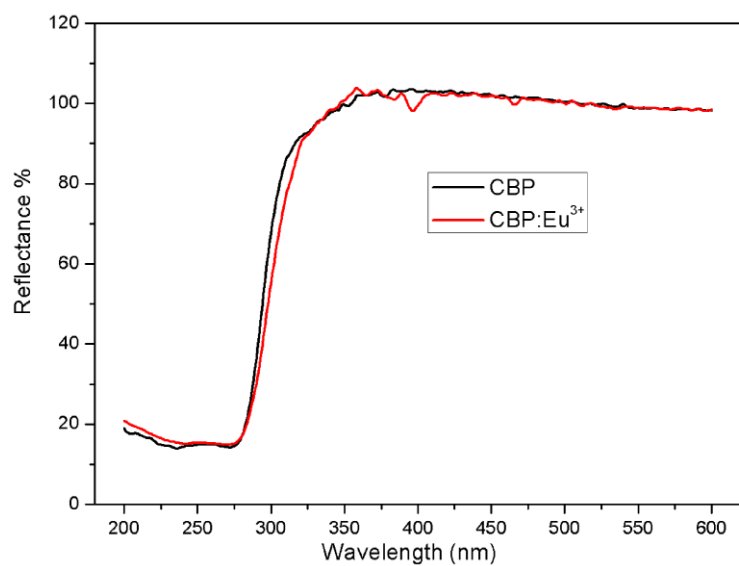

**Figure S1.** Diffuse-reflectance spectra of CBP and CBP:Eu<sup>3+</sup>

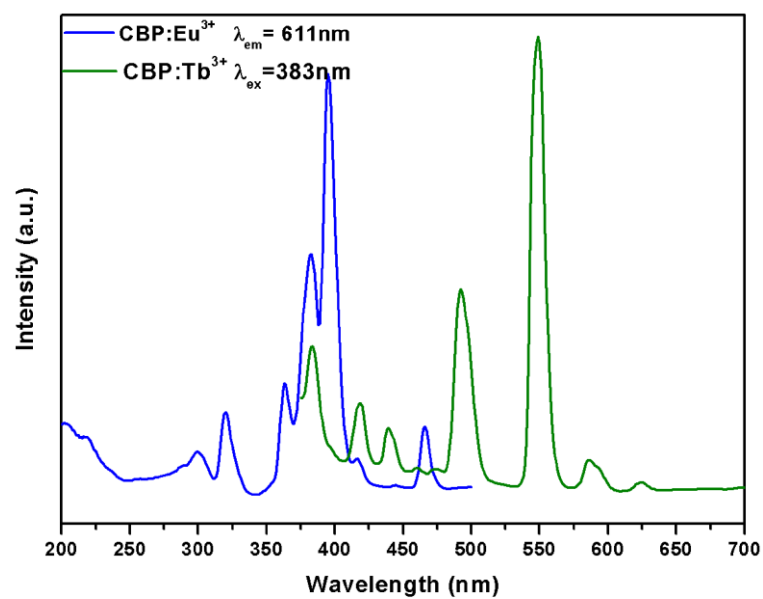

**Figure S2.** The spectral overlap between the PL spectrum of CBP:Tb<sup>3+</sup> and PLE spectrum of CBP:Eu<sup>3+</sup> phosphor

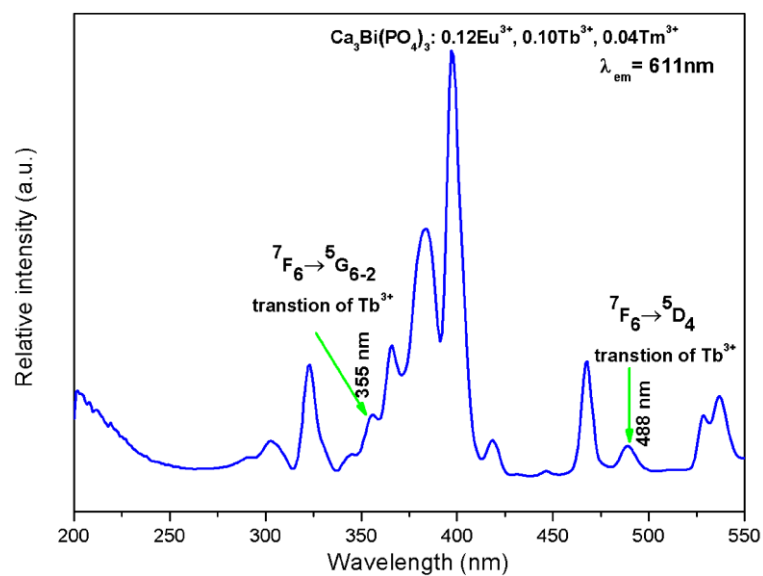

**Figure S3.** The excitation spectrum of  $\text{CBP}: 0.12\text{Eu}^{3+}, 0.10\text{Tb}^{3+}, 0.04\text{Tm}^{3+}$  sample monitored at 611 nm

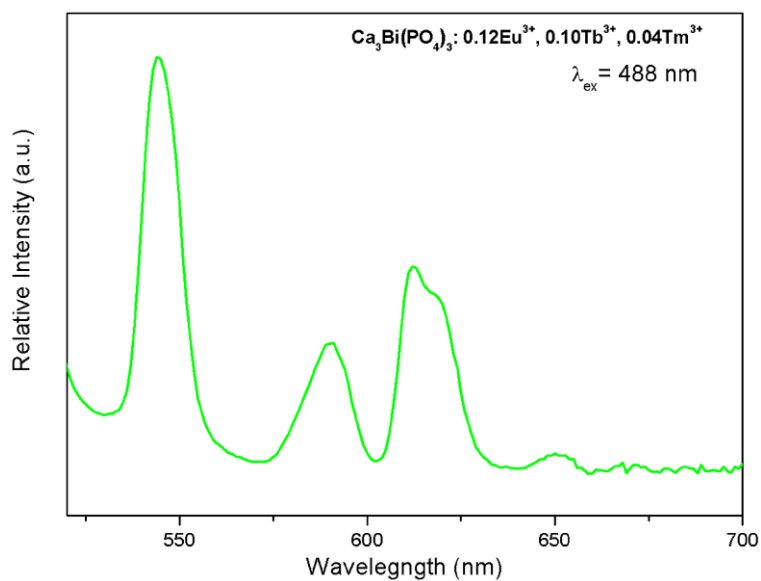

**Figure S4.** The emission spectrum of  $\text{CBP}: 0.12\text{Eu}^{3+}, 0.10\text{Tb}^{3+}, 0.04\text{Tm}^{3+}$  sample at the excitation of 488nm
